# Supplementary material for: Genetic Characterization and Passage Instability of a Hybrid Plasmid Co-Harboring blaIMP-4 and blaNDM-1 Reveal the Contribution of Insertion Sequences During Plasmid Formation and Evolution
Source: PubMed Central journal article supplement (PMC8672901; doi:10.1128/spectrum.01577-21), 2021-12-15
Supplement: spectrum01577-21_supp_1_seq8.pdf [file spectrum01577-21_supp_1_seq8.pdf]

## Supplementary Materials

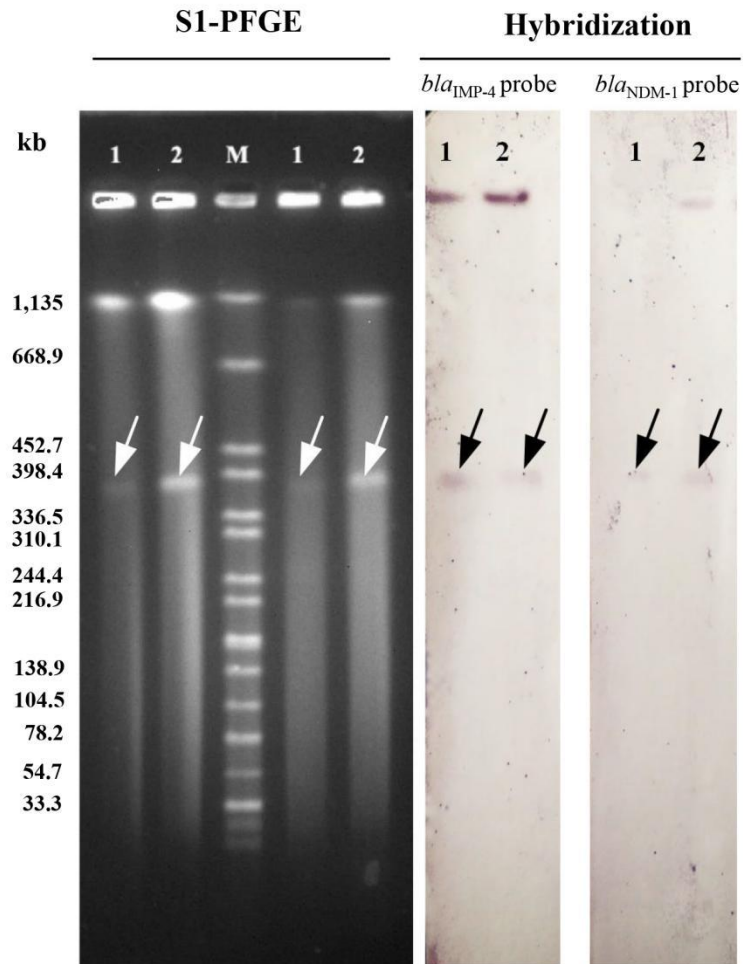

Supplementary Figure 1. S1-PFGE and Southern blot hybridization

1, *K. michiganensis* strain 7525; 2, transconjugant *E. coli* J53 (pKOX7525\_1); M, *Salmonella enterica*, serotype Braenderup H9812 digested by XbaI restriction enzyme. The black arrows are the positive signals via southern blot hybridization with *bla*<sub>IMP-4</sub>-specific or *bla*<sub>NDM-1</sub>-specific probe, respectively.

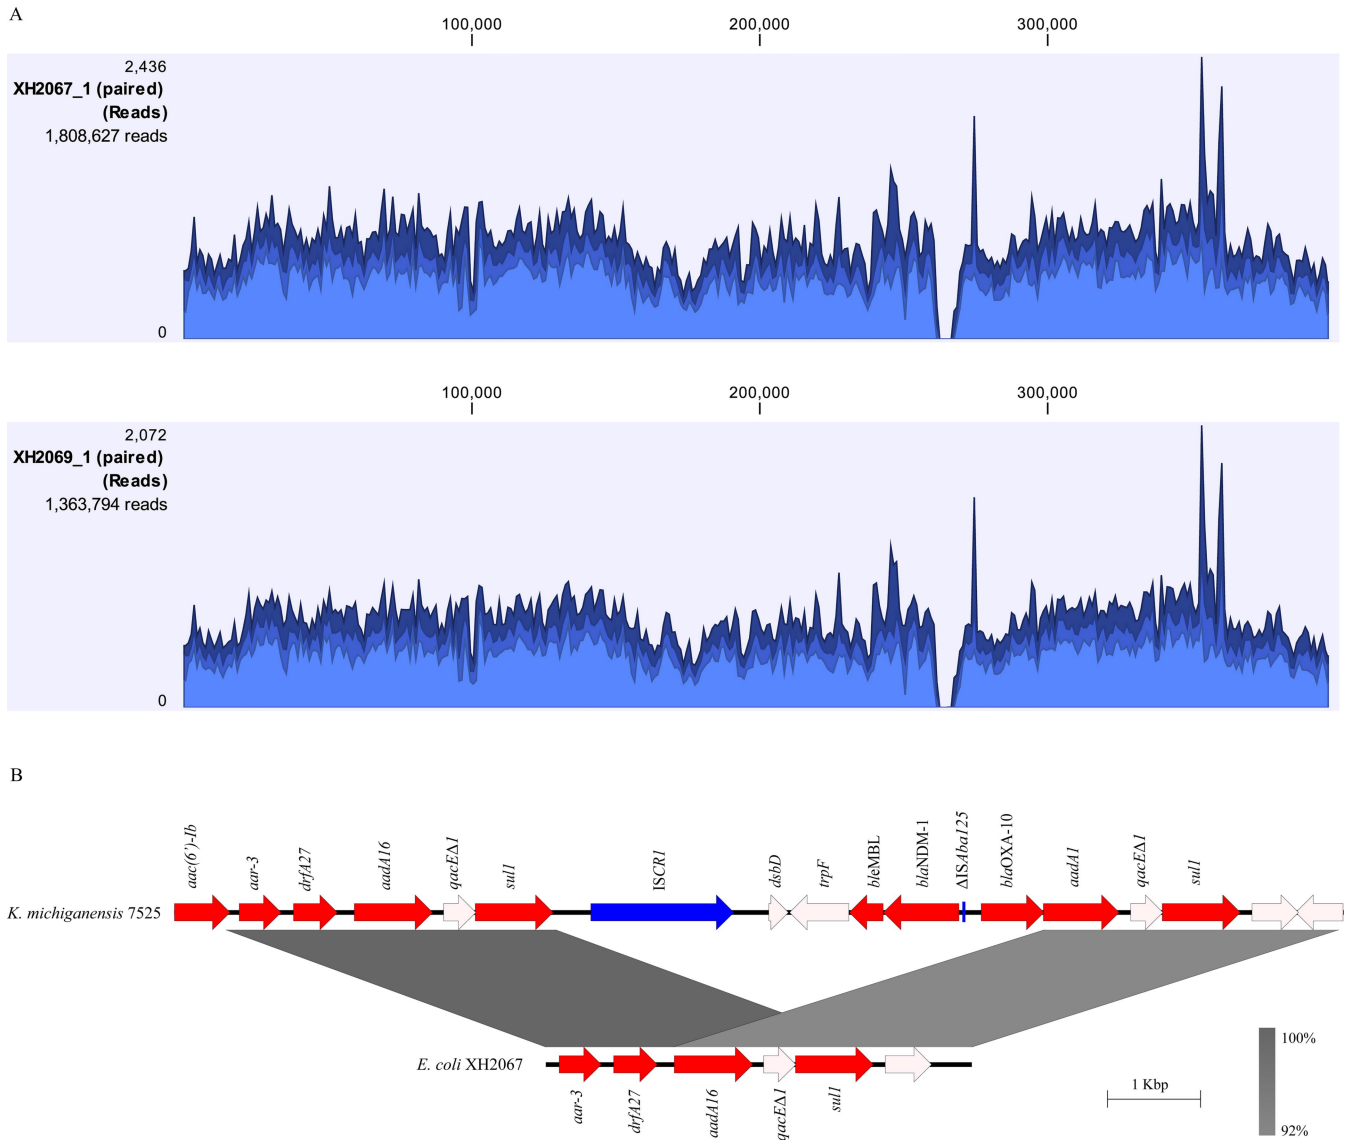

Supplementary Figure 2. Genome alignment between the *E. coli* transconjugants after experimental passage and *K. michiganensis* strain 7525 in the complete plasmid pKOX7525\_1.

(A) Mapping graphs representing read coverage difference between the genome of XH2067 (or XH2069) and the reference sequence (pKOX7525\_1). (B) Scaled, linear diagrams comparing the sequences between XH2057 and pKOX7525\_1. Gray shading and squares in colors indicate homologies between the corresponding genetic loci on each plasmid. Arrows indicate open reading frames, with arrowheads indicating the direction of transcription: red, antibiotic-resistant encoding genes; blue, transposon- and integron-associated genes; Other genes are shown as white arrows.

Supplementary table 1. Strain list used in this study

| Name                                         | Description                                                                                                                                                                                                                                    |
|----------------------------------------------|------------------------------------------------------------------------------------------------------------------------------------------------------------------------------------------------------------------------------------------------|
| <i>Klebsiellia michiganensis</i> strain 7525 | Clinical strain studied in our work co-harboring <i>bla</i> <sub>IMP-4</sub> and <i>bla</i> <sub>NDM-1</sub> on the same plasmid, wild-type                                                                                                    |
| <i>E. coli</i> J53                           | Lab stain <i>Escherichia coli</i> J53, recipient used for transconjugation experiment, sodium azide-resistant                                                                                                                                  |
| <i>E. coli</i> J53 (pKOX7525_1)              | Transconjugant, <i>E. coli</i> J53 containing pKOX7525_1                                                                                                                                                                                       |
| XH2065                                       | Single colony being positive with both <i>bla</i> <sub>IMP-4</sub> and <i>bla</i> <sub>NDM-1</sub> gene, selected from population of <i>E. coli</i> J53 (pKOX7525_1) after ten days of passage in LB broth with 1µg/mL ciprofloxacin           |
| XH2066                                       | Single colony being positive with <i>bla</i> <sub>IMP-4</sub> gene but negative with <i>bla</i> <sub>NDM-1</sub> , selected from population of <i>E. coli</i> J53 (pKOX7525_1) after ten days of passage in LB broth with 1µg/mL ciprofloxacin |
| XH2067                                       | Single colony being positive with <i>bla</i> <sub>IMP-4</sub> gene but negative with <i>bla</i> <sub>NDM-1</sub> , selected from population of <i>E. coli</i> J53 (pKOX7525_1) after ten days of passage in LB broth without antibiotic,       |
| XH2068                                       | Single colony being negative with both <i>bla</i> <sub>IMP-4</sub> and <i>bla</i> <sub>NDM-1</sub> , selected from population of <i>E. coli</i> J53 (pKOX7525_1) after ten days of passage in LB broth without antibiotic                      |
| XH2069                                       | Single colony being positive with <i>bla</i> <sub>IMP-4</sub> but negative with <i>bla</i> <sub>NDM-1</sub> , selected from population of <i>E. coli</i> J53 (pKOX7525_1) after five days of passage in LB broth without antibiotic            |

**Supplemental table 2. Genomic information and antimicrobial resistance gene of *K. michiganensis* strain 7525**

| Name                                           | Size(bp)  | G+C (%) | Antimicrobial resistance genes (copy number)                                                                                                                                                                                                                                                                                                                           | Accession number |
|------------------------------------------------|-----------|---------|------------------------------------------------------------------------------------------------------------------------------------------------------------------------------------------------------------------------------------------------------------------------------------------------------------------------------------------------------------------------|------------------|
| <i>K. michiganensis</i> strain 7525 chromosome | 5,847,354 | 55.69   | <i>bla</i> <sub>OXY-5</sub> , <i>bla</i> <sub>CTX-M-15</sub>                                                                                                                                                                                                                                                                                                           | CP065474         |
| pKOX7525_1                                     | 397,447   | 49.10   | <i>bla</i> <sub>OXA-16</sub> , <i>bla</i> <sub>SFO-1</sub> , <i>bla</i> <sub>IMP-4</sub> , <i>bla</i> <sub>NDM-1</sub> , <i>aac</i> (6')-Ib-cr (3 copies), <i>aac</i> (6')-Ib3, <i>aph</i> (6)-Id, <i>aph</i> (3'')-Ib, <i>qnrS1</i> , <i>qacE</i> (2), <i>aadA16</i> , <i>aadA1</i> (2), <i>sul1</i> (2), <i>mph</i> (A), <i>catB3</i> , <i>ARR-3</i> , <i>dfrA27</i> | CP065475         |
| Plasmid 2                                      | 6,397     | 44.35   | ND                                                                                                                                                                                                                                                                                                                                                                     | NA               |
| Plasmid 3                                      | 3,662     | 46.56   | ND                                                                                                                                                                                                                                                                                                                                                                     | NA               |

NA, not applied. ND, not detected.

**Supplementary table 3. Bioinformatic information of multiple carbapenemase producing CREs reported in China**

| Case. | Species (Number)                 | Isolate name  | Plasmid name | Carbapenem-resistant gene                                    | Size (bp) | Inc type            | year | GenBank No. | Reference |
|-------|----------------------------------|---------------|--------------|--------------------------------------------------------------|-----------|---------------------|------|-------------|-----------|
| 1     | <i>Klebsiella oxytoca</i> (1)    | KOX3          | pKOX3-P5-KPC | <i>bla</i> <sub>KPC-2</sub>                                  | 40,277    | IncP6               | 2017 | KY913901    | [1]       |
|       |                                  |               | pKOX3-P3-NDM | <i>bla</i> <sub>NDM-1</sub>                                  | 55,246    | IncX3               |      | KY913899    |           |
|       |                                  |               | pKOX3-P4-IMP | <i>bla</i> <sub>IMP-4</sub>                                  | 61,680    | IncN                |      | KY913900    |           |
| 2     | <i>Providencia rettgeri</i> (1)  | Strain 2055   | p2055-IMP    | <i>bla</i> <sub>NDM-1</sub> ,<br><i>bla</i> <sub>IMP-4</sub> | 41,936    | IncW                | 2018 | MH882484    | None      |
| 3     | <i>Enterobacter cloacae</i> (2)  | SZECL1        | pKPC3_SZ     | <i>bla</i> <sub>KPC-3</sub>                                  | 43,333    | IncX6               | 2016 | KU302800    | [2]       |
|       |                                  |               | pNDM1_SZ1    | <i>bla</i> <sub>NDM-1</sub>                                  | 130,573   | IncA/C2+IncR        |      | KU302801    |           |
|       |                                  | SZECL2        | pKPC3_SZ     | <i>bla</i> <sub>KPC-3</sub>                                  | 43,333    | IncX6               |      | KU302800    |           |
|       |                                  |               | pNDM1_SZ2    | <i>bla</i> <sub>NDM-1</sub>                                  | 132,232   | IncA/C2             |      | KU302802    |           |
| 4     | <i>Citrobacter freundii</i> (1)  | Strain 112298 | p112298-KPC  | <i>bla</i> <sub>KPC-2</sub>                                  | 117,288   | No hit found        | 2015 | KP987215    | [3]       |
|       |                                  |               | p112298-NDM  | <i>bla</i> <sub>NDM-1</sub>                                  | 53,489    | IncX3               |      | KP987216    |           |
| 6     | <i>Klebsiella pneumoniae</i> (7) | C2315         | pC2315-4-KPC | <i>bla</i> <sub>KPC-2</sub>                                  | 175,540   | IncFIA(HI1)+IncFII  | 2020 | NZ_CP039831 | [4]       |
|       |                                  |               | pC2315-2-NDM | <i>bla</i> <sub>NDM-1</sub>                                  | 317,231   | IncHI1B             |      | NZ_CP039829 |           |
|       |                                  | C2343         | pC2343-4-KPC | <i>bla</i> <sub>KPC-2</sub>                                  | 175,540   | IncFIA(HI1)+IncFII  |      | NZ_CP039826 |           |
|       |                                  |               | pC2343-2-NDM | <i>bla</i> <sub>NDM-1</sub>                                  | 318,848   | IncHI1B             |      | NZ_CP039824 |           |
|       |                                  | C2414         | pC2414-2-KPC | <i>bla</i> <sub>KPC-2</sub>                                  | 172,001   | IncFII(pHN7A8)+IncR |      | NZ_CP039820 |           |
|       |                                  |               | pC2414-3-NDM | <i>bla</i> <sub>NDM-1</sub>                                  | 63,046    | IncN                |      | NZ_CP039821 |           |
|       |                                  | C2660         | pC2660-3-KPC | <i>bla</i> <sub>KPC-2</sub>                                  | 153,556   | IncFII(pHN7A8)+IncR |      | NZ_CP039810 |           |
|       |                                  |               | pC2660-4-NDM | <i>bla</i> <sub>NDM-1</sub>                                  | 53,097    | IncX3               |      | NZ_CP039811 |           |
|       |                                  | C2601         | pC2601-3-KPC | <i>bla</i> <sub>KPC-2</sub>                                  | 97,386    | IncFII(Yp)          |      | NZ_CP039815 |           |
|       |                                  |               | pC2601-5-NDM | <i>bla</i> <sub>NDM-1</sub>                                  | 51,995    | IncN2               |      | NZ_CP039817 |           |
|       |                                  | C2972         | pC2972-4-KPC | <i>bla</i> <sub>KPC-2</sub>                                  | 97,386    | IncFII (Yp)         |      | NZ_CP039805 |           |
|       |                                  |               | pC2972-5-NDM | <i>bla</i> <sub>NDM-1</sub>                                  | 51,995    | IncN2               |      | NZ_CP039806 |           |
|       |                                  | C2974         | pC2974-4-KPC | <i>bla</i> <sub>KPC-2</sub>                                  | 97,466    | IncFII(Yp)          |      | NZ_CP039798 |           |
|       |                                  |               | pC2974-6-NDM | <i>bla</i> <sub>NDM-1</sub>                                  | 51,995    | IncN2               |      | NZ_CP039800 |           |

**References**

### Plasmid co-harboring *bla*<sub>IMP-4</sub> and *bla*<sub>NDM-1</sub>

- [1] J. Wang, M. Yuan, H. Chen, X. Chen, Y. Jia, X. Zhu, L. Bai, X. Bai, S. Fanning, J. Lu, and J. Li, First Report of *Klebsiella oxytoca* Strain Simultaneously Producing NDM-1, IMP-4, and KPC-2 Carbapenemases. *Antimicrob Agents Chemother* 61 (2017).
- [2] H. Du, L. Chen, K.D. Chavda, R. Pandey, H. Zhang, X. Xie, Y.W. Tang, and B.N. Kreiswirth, Genomic Characterization of *Enterobacter cloacae* Isolates from China That Coproduce KPC-3 and NDM-1 Carbapenemases. *Antimicrob Agents Chemother* 60 (2016) 2519-23.
- [3] J. Feng, Y. Qiu, Z. Yin, W. Chen, H. Yang, W. Yang, J. Wang, Y. Gao, and D. Zhou, Coexistence of a novel KPC-2-encoding MDR plasmid and an NDM-1-encoding pNDM-HN380-like plasmid in a clinical isolate of *Citrobacter freundii*. *J Antimicrob Chemother* 70 (2015) 2987-91.
- [4] H. Gao, Y. Liu, R. Wang, Q. Wang, L. Jin, and H. Wang, The transferability and evolution of NDM-1 and KPC-2 co-producing *Klebsiella pneumoniae* from clinical settings. *EBioMedicine* 51 (2020) 102599.
